# Supplementary material for: Optimisation of photosynthetic carbon gain and within-canopy gradients of associated foliar traits for Amazon forest trees
Source: Copernicus journal article supplement (doi:10.5194/bg-7-1833-2010), 2010-06-04
Supplement: Supplementary file 1 [file bg-7-1833-2010-supplement.pdf]

## Supplementary Information

In order to determine if there is a general relationship between overall photosynthetic capacity and the magnitude of within-canopy gradients we surveyed the literature to determine values of the capacity of ribulose-1,5-bisphosphate-carboxylase/oxygenase (Rubisco) for upper canopy leaves,  $V_{\max(0)}$ , and an extinction coefficient describing the exponential decline with depth in the canopy (expressed as the cumulative leaf area index,  $L$ , from the top down) with the Rubisco extinction coefficient being denoted  $k_v$ . For some studies, e.g. Carswell et al. (2000), these parameters were directly estimable, but in many cases some assumptions had to be made; for example to deduce either the Rubisco activity from measurement of the light saturated photosynthetic rate - this requiring an estimate of the intercellular partial pressure of  $\text{CO}_2$  ( $c_i$ ) or to estimate  $L$  from the given light profile. For the former case, we also used the standard equations of Rubisco limited photosynthesis (Farquhar et al. 1980) with Rubisco kinetic constants as given by Bernacchi *et al.* (2001). For converting radiation interception values to  $L$ , we took where  $I/I_0$  represents the incident flux density,  $I$ , relative to that at the top of the canopy,  $I_0$ , as given in several of the studies (eg. Hollinger, 1996; Kull and Niinemets, 1998; Meir *et al.*, 2002) taking a general value for the light extinction coefficient,  $k_l$ , of 0.6 except where as noted in Table S1.

## References

- Bernacchi, C. J., Singaas, E. L. Pimental, C., Portis Jr., A. R. and Long, S. P., Improved temperature response functions for models of Rubisco-limited photosynthesis, *Plant Cell Environ.*, 24, 253-259, 2001.
- Carswell, F. E., Meir, P., Wandelli, E. V., Bonates, L. C. M., Kruijt, B., Barbosa, E. M., Nobre, A. D. Grace, J., and Jarvis, P. G.: Photosynthetic capacity in a central Amazonian rain forest, *Tree Physiol.*, 20, 179-186, 2000.
- Domingues, T. F., Berry, J. A., Martinelli, L. A., Ometto, J. P. H. B. and Ehleringer, J. R.: Parameterization of canopy structure and leaf-level gas exchange for an Amazonian tropical rain forest (Tapajós National Forest, Pará, Brazil). *Earth Interactions*, 9, Paper No. 17, 2005.
- Ellsworth, D. S. and Reich, P. B.: canopy structure and vertical patterns of photosynthesis and related leaf traits in a deciduous forest, *Oecologia*, 96, 169-178, 1993.
- Farquhar, G. D. von Caemmerer, S. and Berry, J. A.: A biochemical model of the photosynthetic assimilation in  $\text{C}_3$  species, *Planta* 149, 78-90, 1980.
- Goudriaan, J.: *Crop micrometeorology: a simulation study*, Wageningen Centre for Agricultural Publishing and Documentation, The Netherlands, 1977.
- Green, S. D., Kruger, E. L., Stanosz, G. R. and Isebrands, J. G.: Light-use efficiency of native and hybrid poplar genotypes at high levels of intracanopy competition, *Can. J. Forest Res.* 31, 1030-1037.
- Hollinger, D. Y.: Optimality and nitrogen allocation in a tree canopy, *Tree Physiol.*, 16, 627-634, 1996.
- Kull, O. and Niinemets U.: Distribution of photosynthetic properties in leaf canopies; comparison of species with different shade tolerance, *Funct. Ecol.*, 12, 472-479, 1998.
- Mercado, L., Lloyd, J., Carswell, F., Mahli, Y., Meir, P. and Nobre, A. D.: Modelling Amazonian forest eddy covariance data: A comparison of big leaf versus sun/shade models for the C-14 tower at Manaus I. Canopy photosynthesis, *Acta Amazonica*, 36, 69-82, 2006.
- Meir P., Kruijt, B., Broadmeadow, M., Barbosa, E., Kull, O., Carswell, F., Nobre, A. and Jarvis P. G.: Acclimation of photosynthetic capacity to irradiance in tree canopies in relation to leaf nitrogen and leaf mass per unit area, *Plant Cell Environ.*, 25, 343-357, 2002.
- Miyazawa, S.-I., Suzuki, A. A., Sone, K. and Terashima, I.: Relationships between light and leaf nitrogen remobilization in the crowns of mature evergreen *Quercus glauca* trees, *Tree Physiol*, 24, 1157-1164, 2004.
- Posada, J. M., Lechowicz, M. J. and Kitajima, K.: Optimal photosynthetic use of light by tropical tree crowns achieved by adjustment of individual leaf angles and nitrogen content, *Ann. Bot.*, 103, 795-805, 2009.
- Raulier, F., Bernier, P. and Ung, C.-H.: Canopy photosynthesis of sugar maple (*Acer saccharum*): comparing big-leaf and multi-layer extrapolations of leaf-level measurements, *Tree Physiol.*, 19, 407-420.
- Turnbull, T. L., Kelly, N., Adams, M. A. and Warren, C. R.: Within canopy nitrogen and photosynthetic gradients are unaffected by soil fertility in field-grown *Eucalyptus globulus*, *Tree Physiol.*, 27, 1607-1617.
- Uemura, A., Harayama, H., Koike, N. And Ishida, A.: Coordination of crown structure, leaf plasticity and carbon gain within the crowns of three winter-deciduous mature trees, *Tree Physiol.*, 26, 633-641, 2006.
- Walcroft, A., le Roux, X., Diaz-Espejo, A., Dones, N. And Sinoquet, H.: Effect of crown development on leaf irradiance, leaf morphology and photosynthetic capacity in a peach tree, *Tree Physiol.*, 22, 929-938.
- Wirth, R., Weber, B., and Ryel, R. J.: Spatial and temporal variability of canopy structure in a tropical moist forest, *Acta Oecologica*, 22, 235-244, 2001.

| Species                                         | Reference                      | $V_{\max(0)}$<br>( $\mu\text{mol m}^{-2} \text{s}^{-1}$ ) | $k_v$ | Notes                                                                                                                                                                                                           |
|-------------------------------------------------|--------------------------------|-----------------------------------------------------------|-------|-----------------------------------------------------------------------------------------------------------------------------------------------------------------------------------------------------------------|
| <i>Acer saccharum</i>                           | Ellsworth and Reich (1993)     | 32                                                        | 0.11  | $V_{\max(0)}$ and $k_v$ estimated directly from Fig. 4b and Fig. 5a assuming $c_i = 22$ Pa.                                                                                                                     |
| <i>Acer saccharum</i>                           | Raulier <i>et al.</i> (1999)   | 63                                                        | 0.18  | $V_{\max(0)}$ and $k_v$ estimated from Fig. 6 with $k_1 = 0.5$ (as stated in the text) with $c_i = 22$ Pa (Fig 2)                                                                                               |
| <i>Betula grossa</i>                            | Uemura <i>et al.</i> (2006)    | 39                                                        | 0.13  | By matching profiles of $A_{\max}$ at high $[\text{CO}_2]$ (their $A_{\text{sat}}$ ) and $L$ with height with $V_{\max(0)}$ estimated from $A_{\text{maa}(0)}$ at high $[\text{CO}_2]$ assuming $c_i = 100$ Pa. |
| <i>Betula pendula</i>                           | Meir <i>et al.</i> (2002)      | 114                                                       | 0.25  | $V_{\max(0)}$ directly from the authors, $k_v$ estimated from Fig. 5 assuming $k_1 = 0.6$                                                                                                                       |
| <i>Castilla elastica</i>                        | Poseda <i>et al.</i> (2009)    | 84                                                        | 0.36  | $V_{\max(0)}$ estimated from profiles of $A_{\max}$ in Fig. 1 assuming $c_i = 22$ Pa and with $k_1 = 0.7$ (Wirth <i>et al.</i> , 2001).                                                                         |
| <i>Eucalyptus globules</i>                      | Turnbull <i>et al.</i> (2007)  | 50                                                        | 0.17  | $V_{\max(0)}$ and $k_v$ estimated from Fig. 6 using a low $k_1$ of 0.3 due to near vertical leaf orientation (Goudriann, 1977).                                                                                 |
| <i>Fagus crenata</i> *                          | Uemura <i>et al.</i> (2006)    | 54                                                        | 0.14  | By matching profiles of $A_{\max}$ (high $[\text{CO}_2]$ ) and $L$ with height with $V_{\max(0)}$ estimated from $A_{\text{maa}(0)}$ (high $[\text{CO}_2]$ ) assuming $c_i = 100$ Pa.                           |
| <i>Fagus sylvatica</i>                          | Meir <i>et al.</i> (2002)      | 64                                                        | 0.19  | $V_{\max(0)}$ directly from the authors, $k_v$ estimated from Fig. 5 assuming $k_1 = 0.6$                                                                                                                       |
| <i>Ficus insipid</i>                            | Poseda <i>et al.</i> (2009)    | 111                                                       | 0.43  | $V_{\max(0)}$ estimated from profile of $A_{\max}$ in Fig. 1 (upper curve) assuming $c_i = 22$ Pa and with $k_1 = 0.7$ (Wirth <i>et al.</i> , 2001).                                                            |
| <i>Lubea seemanii</i>                           | Poseda <i>et al.</i> (2009)    | 95                                                        | 0.22  | $V_{\max(0)}$ estimated from profile of $A_{\max}$ in Fig. 1 (upper curve) assuming $c_i = 22$ Pa and with $k_1 = 0.7$ (Wirth <i>et al.</i> , 2001).                                                            |
| <i>Nothofagus fusca</i>                         | Hollinger (1996)               | 40                                                        | 0.11  | $V_{\max(0)}$ from Table 1, $k_v$ estimated from Fig. 4 assuming $k_1 = 0.6$ with two outliers omitted from the analysis.                                                                                       |
| <i>Populus tremula</i>                          | Kull and Niinemets (1998)      | 113                                                       | 0.24  | $V_{\max(0)}$ from initial slope of $A_i c_i$ curve, with $k_v$ also estimated from Fig. 2a assuming $k_1 = 0.7$ (Green <i>et al.</i> 2001)                                                                     |
| <i>Prunus persica</i>                           | Walcroft <i>et al.</i> (2002)  | 80                                                        | 0.16  | $V_{\max(0)}$ and $k_v$ from Fig 3c (May 1999) using relationship of Fig. 6 and assuming $k_1 = 0.6$                                                                                                            |
| <i>Quercus glauca</i>                           | Miyazawa <i>et al.</i> (2004)  | 98                                                        | 0.10  | Gradient in $V_{\max}$ estimated from gradient in $[\text{N}]_A$ (Fig. 2) and relationships between $[\text{N}]_A$ and both $A_{\max}$ and $c_i$ (Fig. 3) assuming $k_1 = 0.6$ .                                |
| <i>Quercus petraea</i>                          | Meir <i>et al.</i> (2002)      | 104                                                       | 0.20  | $V_{\max(0)}$ directly from the authors, $k_v$ estimated from Fig. 5 assuming $k_1 = 0.6$                                                                                                                       |
| <i>Tilia cordata</i>                            | Kull and Niinemets (1998)      | 78                                                        | 0.17  | $V_{\max(0)}$ from initial slope of $A_i c_i$ curve, with $k_v$ also estimated from Fig. 2a assuming $k_1 = 0.7$ (Green <i>et al.</i> 2001)                                                                     |
| Miscellaneous tropical forest species (Manaus)  | Carswell <i>et al.</i> (2000)  | 58                                                        | 0.18  | As independently estimated by Mercado <i>et al.</i> (2006).                                                                                                                                                     |
| Miscellaneous tropical forest species (Tapajos) | Domingues <i>et al.</i> (2005) | 64                                                        | 0.15  | With $k_v$ as estimated in the main text, with $V_{\max(0)}$ directly from equations in Tables 3 and 4.                                                                                                         |

**Table S1.** Values for Rubisco activity of uppermost canopy leaves,  $V_{\max(0)}$ , and the Rubisco extinction coefficient  $k_v$  used for Figure 10 in the main text.

\**Fagus japonica* was not analysed as its profiles appear very similar to *F. crenata*.
